# Supplementary material for: MIA is an open-source standalone deep learning application for microscopic image analysis
Source: PubMed Central journal article supplement — Cell Rep Methods. 2023 Jun 26;3(7):100517. doi: 10.1016/j.crmeth.2023.100517 (PMC10391334; doi:10.1016/j.crmeth.2023.100517), 2023-06-26
Supplement: mmc1.pdf [file mmc1.pdf]

**Cell Reports Methods, Volume 3**

**Supplemental information**

**MIA is an open-source standalone deep learning  
application for microscopic image analysis**

**Nils Körber**

## Supplemental Information

### Supplemental Tables

**Table S1: Results of the task-specific usability questionnaire, related to STAR methods.**

|                                                                                     | strongly agree | agree | neutral | disagree | strongly disagree |
|-------------------------------------------------------------------------------------|----------------|-------|---------|----------|-------------------|
| <i>I am satisfied with the ease of completing the task</i>                          | 7              | 3     | 2       | 1        | 0                 |
| <i>I am satisfied with the time it took to complete the task</i>                    | 9              | 2     | 2       | 0        | 0                 |
| <i>I could finish the task without further assistance</i>                           | 7              | 4     | 0       | 2        | 0                 |
| <i>I am satisfied by the results of the trained network given the training data</i> | 3              | 9     | 1       | 0        | 0                 |

**Table S2: Results of the software-specific usability questionnaire, related to STAR methods.**

|                                                                          | strongly agree | agree | neutral | disagree | strongly disagree |
|--------------------------------------------------------------------------|----------------|-------|---------|----------|-------------------|
| <i>Overall, my experience with the software was positive</i>             | 9              | 4     | 0       | 0        | 0                 |
| <i>I would reuse the software</i>                                        | 5              | 7     | 1       | 0        | 0                 |
| <i>I would recommend the software to a friend/colleague</i>              | 6              | 7     | 0       | 0        | 0                 |
| <i>The software is visually appealing</i>                                | 5              | 7     | 1       | 0        | 0                 |
| <i>The software is intuitive</i>                                         | 4              | 4     | 5       | 0        | 0                 |
| <i>The complex workflow of deep learning is well integrated</i>          | 5              | 7     | 1       | 0        | 0                 |
| <i>The software can help researchers with their image analysis tasks</i> | 10             | 3     | 0       | 0        | 0                 |
